# Supplementary material
Source: publisher site journal article supplement (https://www.spandidos-publications.com/5414/downloadSupplementary)

Figure S1. Effect of hsa-miR-216a-3q inhibitors on expression of Wnt3a and effects of siWnt3a on cell viability. (A) hsa-miR-216a-3q inhibitors had no effects on expression of Wnt3a in the HSC-6 cell line. (B) hsa-miR-216a-3q inhibitors have no effects on expression of the Wnt3a in the CAL-27 cell line. (C) siWnt3a has no effect on cell viability in HSC-6 cell line. (D) siWnt3a has no effect on cell viability in the CAL-27 cell line. (E) hsa-miR-216a-3q inhibitors had no effects on expression of Wnt3a in the HSC-6 cell line. (F) hsa-miR-216a-3q inhibitors had no effects on expression of Wnt3a in the CAL-27 cell line. \*\*P<0.01 vs. CTR. miR, microRNA; si, small interfering; CTR, control.

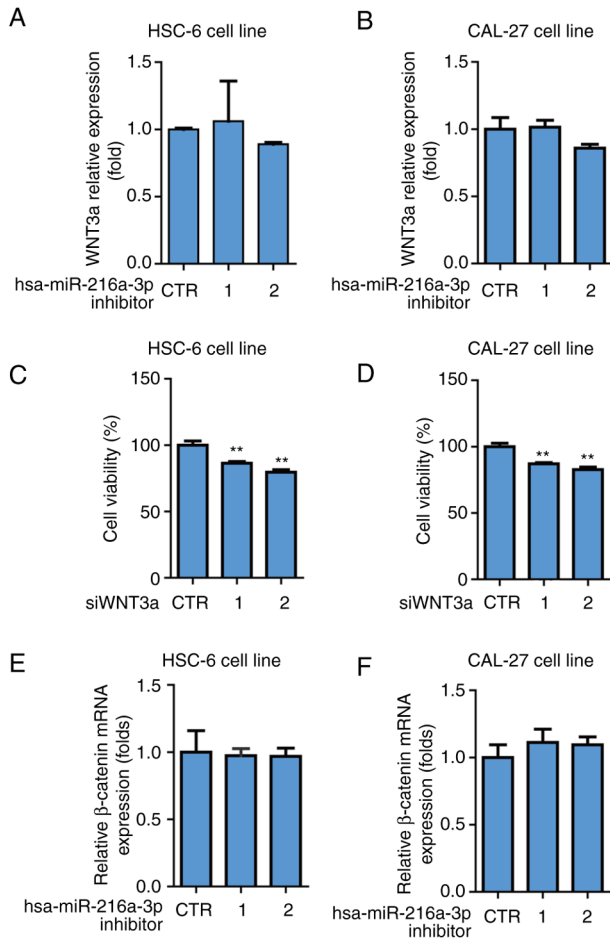

Supplement: Supplementary file 1 [file downloadSupplementary]
